# Supplementary material for: Crosslinked Pore-Filling Anion Exchange Membrane Using the Cylindrical Centrifugal Force for Anion Exchange Membrane Fuel Cell System
Source: MDPI journal article supplement (doi:10.3390/polym12112758), 2020-11-23
Supplement: s1 [file s1]

## **Supporting Information**

# **Crosslinked Pore-filling Anion Exchange Membrane using the Cylindrical Centrifugal Force for Anion Exchange Membrane Fuel Cell System**

Tae Yang Son<sup>1</sup>, Tae Hyun Kim<sup>2</sup> and Sang Yong Nam<sup>1,\*</sup>

<sup>1</sup>Department of Materials Engineering and Convergence Technology, Engineering Research Institute, Gyeongsang National University, Jinju, Republic of Korea; kr6620@naver.com (T.Y.S.)

<sup>2</sup>Organic Material Synthesis Laboratory, Department of Chemistry, Incheon National University, Incheon, Republic of Korea; tkim@inu.ac.kr (T.H.K.)

\*Correspondence: walden@gnu.ac.kr (S.Y.N); Tel.: +82-55-772-1657; Fax: +82-55-772-1659

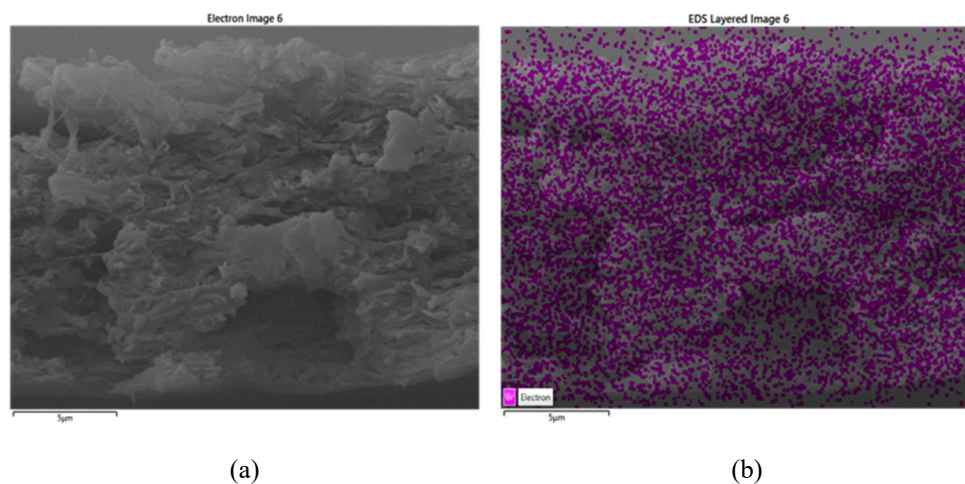

**Figure S1.** FE-SEM and EDS images of crosslinked pore-filled membrane (cross-section): (a) FE-SEM image of PF-XAc-PPO70\_25 and (b) EDS image of PF-XAc-PPO70\_25

As can be seen in Figure S1, it was confirmed that Br ions present in the prepared crosslinked pore-filling membrane were distributed throughout the cross-section. It can be seen that the anion exchange polymer is well impregnated into the porous support.
